# Supplementary material for: Energy barriers between H-bonded and stacked structures of 9-methyladenine⋯1-methylthymine and 9-methylguanine⋯1-methylcytosine complexes
Source: Royal Society of Chemistry journal article supplement (doi:10.1039/b913209k), 2009-11-13
Supplement: b913209k.pdf [file b913209k.pdf]

36

|                   |                   |                   |                  |
|-------------------|-------------------|-------------------|------------------|
| n                 | -0.10884834907049 | -2.72043040811549 |                  |
| 0.27341484039236  |                   |                   |                  |
| c                 | 0.81913026240346  | -1.80688800728249 |                  |
| 0.65553927212980  |                   |                   |                  |
| n                 | 1.06786505138474  | -1.66118187795477 |                  |
| 1.97945041769820  |                   |                   |                  |
| c                 | 2.00253072982833  | -0.77435321177652 |                  |
| 2.36728435638946  |                   |                   |                  |
| n                 | 2.75851393262624  | 0.03317768454537  | 1.60938853500870 |
| c                 | 2.48786685856779  | -0.13453911310890 |                  |
| 0.30323413951311  |                   |                   |                  |
| c                 | 1.56384613926500  | -1.02714564613483 |                  |
| -0.25330772889792 |                   |                   |                  |
| n                 | 1.53406936588595  | -0.90627551757882 |                  |
| -1.63665652010068 |                   |                   |                  |
| c                 | 2.43072052496728  | 0.03428128465036  |                  |
| -1.88758891304411 |                   |                   |                  |
| n                 | 3.04569215014362  | 0.53226985205180  |                  |
| -0.76648068440141 |                   |                   |                  |
| h                 | 2.15739876803305  | -0.70338104246045 |                  |
| 3.44116468973047  |                   |                   |                  |
| h                 | 2.67872080721503  | 0.40664046918068  |                  |
| -2.87234865645047 |                   |                   |                  |
| c                 | 4.03059993681172  | 1.61359196880263  |                  |
| -0.70608697606234 |                   |                   |                  |
| h                 | -0.71283244174474 | -3.09437556817114 |                  |
| 0.99570120002116  |                   |                   |                  |
| h                 | -0.50707496926612 | -2.66582048531547 |                  |
| -0.65807431156766 |                   |                   |                  |
| h                 | 3.61324151656262  | 2.45815639399819  |                  |
| -0.15326134882962 |                   |                   |                  |
| h                 | 4.93708882598986  | 1.26016869195059  |                  |
| -0.21098304806372 |                   |                   |                  |
| h                 | 4.26303647494064  | 1.91919521361763  |                  |
| -1.72594443636159 |                   |                   |                  |
| n                 | -1.24739983993024 | 0.28446804309324  |                  |
| -1.12451312626357 |                   |                   |                  |
| c                 | -0.92694072120455 | 1.43758541202860  |                  |
| -0.42803202888704 |                   |                   |                  |
| n                 | -1.86750931763553 | 1.79415257331171  |                  |
| 0.53278355100685  |                   |                   |                  |
| c                 | -2.99572540886143 | 1.03513533025740  |                  |
| 0.74977527652429  |                   |                   |                  |
| c                 | -3.28855493559419 | -0.10608737867466 |                  |
| 0.06824127925540  |                   |                   |                  |
| c                 | -2.34745002079939 | -0.55889960251864 |                  |
| -0.93519027572848 |                   |                   |                  |
| o                 | 0.09831690065352  | 2.08533856563903  |                  |
| -0.63806004330989 |                   |                   |                  |
| o                 | -2.43913864537695 | -1.60725921176330 |                  |
| -1.59664661847539 |                   |                   |                  |
| c                 | -4.52018920908355 | -0.92294750924533 |                  |
| 0.33669791252756  |                   |                   |                  |
| c                 | -1.60570155504278 | 3.01302613890962  |                  |
| 1.31976657801478  |                   |                   |                  |
| h                 | -0.51912936606369 | -0.04849280711851 |                  |
| -1.76164855666262 |                   |                   |                  |
| h                 | -3.65039613603757 | 1.41707540228018  |                  |
| 1.52566138289265  |                   |                   |                  |
| h                 | -5.12917185249065 | -1.01849632765776 |                  |
| -0.56926177689479 |                   |                   |                  |
| h                 | -5.12872195765831 | -0.46085062049777 |                  |
| 1.11824210339241  |                   |                   |                  |

|                  |                   |                   |
|------------------|-------------------|-------------------|
| h                | -4.25322356622666 | -1.93681204496789 |
| 0.65586149411398 |                   |                   |
| h                | -1.53319269285926 | 3.87530074179592  |
| 0.65417042048796 |                   |                   |
| h                | -0.67248795224501 | 2.90243530411027  |
| 1.87600193991063 |                   |                   |
| h                | -2.43496708008581 | 3.14938321755600  |
| 2.01225798514533 |                   |                   |

36

|                   |                   |                   |                  |
|-------------------|-------------------|-------------------|------------------|
| n                 | -2.38037246488240 | -2.14621648676219 |                  |
| 0.91717569161171  |                   |                   |                  |
| c                 | -1.26908279621865 | -2.13507261062387 |                  |
| 0.13295190159095  |                   |                   |                  |
| n                 | -1.38410009567648 | -2.54358796704808 |                  |
| -1.15041801108521 |                   |                   |                  |
| c                 | -0.29245200636523 | -2.51647932951670 |                  |
| -1.93333901694601 |                   |                   |                  |
| n                 | 0.94438152932038  | -2.08662650726506 |                  |
| -1.63664669583758 |                   |                   |                  |
| c                 | 1.02667644449622  | -1.71283578256411 |                  |
| -0.35035174720763 |                   |                   |                  |
| c                 | 0.00036292823829  | -1.73967746607344 |                  |
| 0.60527828117882  |                   |                   |                  |
| n                 | 0.45791485189337  | -1.31144835472187 |                  |
| 1.84224634996525  |                   |                   |                  |
| c                 | 1.72570516173887  | -1.02719231364495 |                  |
| 1.62531032008264  |                   |                   |                  |
| n                 | 2.13500115245122  | -1.23256268077347 |                  |
| 0.32200778233446  |                   |                   |                  |
| h                 | -0.44162914737296 | -2.86800012226327 |                  |
| -2.95138072848378 |                   |                   |                  |
| h                 | 2.41002692445230  | -0.63569714618233 |                  |
| 2.36583494105377  |                   |                   |                  |
| c                 | 3.44489652349500  | -0.94123572818490 |                  |
| -0.25753789308956 |                   |                   |                  |
| h                 | -3.25803624336122 | -2.25460540717110 |                  |
| 0.42363659249986  |                   |                   |                  |
| h                 | -2.39099124999913 | -1.51572044731214 |                  |
| 1.71228822348376  |                   |                   |                  |
| h                 | 4.21287367132389  | -1.57895276515758 |                  |
| 0.18948810461520  |                   |                   |                  |
| h                 | 3.38188896996392  | -1.14889258048569 |                  |
| -1.32677227234232 |                   |                   |                  |
| h                 | 3.68801683504407  | 0.11160906581709  |                  |
| -0.09033954345465 |                   |                   |                  |
| n                 | -0.21221355844906 | 1.69439340787355  |                  |
| 1.27854887915545  |                   |                   |                  |
| c                 | 0.88439460193813  | 2.06957640349980  | 0.52159855253498 |
| n                 | 0.56451211031000  | 2.37409283626645  |                  |
| -0.80415289745889 |                   |                   |                  |
| c                 | -0.71091076889161 | 2.18545412719613  |                  |
| -1.30165281137693 |                   |                   |                  |
| c                 | -1.74758782388300 | 1.70435396525454  |                  |
| -0.57166371317229 |                   |                   |                  |
| c                 | -1.51479229504034 | 1.39667891126023  |                  |
| 0.83351914806178  |                   |                   |                  |
| o                 | 2.02520477056881  | 2.13940179076918  | 0.97169772824988 |
| o                 | -2.34433749037622 | 0.92681781783724  |                  |
| 1.61154518645623  |                   |                   |                  |
| c                 | -3.10938484118518 | 1.44075658391776  |                  |
| -1.14451553992071 |                   |                   |                  |
| c                 | 1.65807254763927  | 2.76169334080608  |                  |
| -1.70621118835173 |                   |                   |                  |
| h                 | 0.00016451620289  | 1.39418878528252  | 2.22628254137528 |
| h                 | -0.81816976652284 | 2.42600542833869  |                  |
| -2.35495484198901 |                   |                   |                  |
| h                 | -3.33215242526228 | 0.36786128724830  |                  |
| -1.11482440039995 |                   |                   |                  |
| h                 | -3.16932294099623 | 1.77780391235470  |                  |
| -2.18325407813562 |                   |                   |                  |
| h                 | -3.88323298031862 | 1.94912416203527  |                  |
| -0.56004349521910 |                   |                   |                  |

|                   |                  |                  |
|-------------------|------------------|------------------|
| h                 | 1.97748553354487 | 1.90756091468012 |
| -2.31323472301161 |                  |                  |
| h                 | 2.49020769206102 | 3.10053465022119 |
| -1.09074898996449 |                  |                  |
| h                 | 1.31698619950484 | 3.57063501976433 |
| -2.35610061572609 |                  |                  |

```
;;;  
;mA...mT;mA...mT + ZPVE;mA...mT cosmo  
H;-1000.6246415320;-1000.3464547320;-1000.6494805045  
S;-1000.6200775937;-1000.3405635937;-1000.6464501796  
TS;-1000.6143979350;-1000.3357870350;-1000.6416417860  
;;;  
;mG...mC;mG...mC + ZPVE;mG...mC cosmo  
H;-1016.6824341920;-1016.4153863920;-1016.7163080625  
S;-1016.6632509298;-1016.3955038298;-1016.7034349018  
TS;-1016.6624960184;-1016.3947999184;-1016.7016207149
```

36

|                   |                   |                   |                  |
|-------------------|-------------------|-------------------|------------------|
| n                 | -2.58495582890626 | -1.84521115821860 |                  |
| 0.91194078759479  |                   |                   |                  |
| c                 | -1.49419087427171 | -1.75516346314921 |                  |
| 0.10800564775472  |                   |                   |                  |
| n                 | -1.66960744225491 | -1.85131459304441 |                  |
| -1.22807284677515 |                   |                   |                  |
| c                 | -0.59229706189853 | -1.74750194921005 |                  |
| -2.02198963280650 |                   |                   |                  |
| n                 | 0.69329093715579  | -1.55754118482245 |                  |
| -1.68171516144891 |                   |                   |                  |
| c                 | 0.83304133355144  | -1.49756494219782 |                  |
| -0.34748994247140 |                   |                   |                  |
| c                 | -0.18708264036341 | -1.58756643281797 |                  |
| 0.60982517023201  |                   |                   |                  |
| n                 | 0.31653386458655  | -1.46041077340972 |                  |
| 1.89339823993052  |                   |                   |                  |
| c                 | 1.61083668014499  | -1.30617273714822 |                  |
| 1.70596633283194  |                   |                   |                  |
| n                 | 1.99612175799074  | -1.32418330897028 |                  |
| 0.37858358069870  |                   |                   |                  |
| h                 | -0.79270472322848 | -1.82192493385425 |                  |
| -3.08825036222963 |                   |                   |                  |
| h                 | 2.33967125674201  | -1.16398042129769 |                  |
| 2.49272831405423  |                   |                   |                  |
| c                 | 3.34435463198726  | -1.14229801957525 |                  |
| -0.15768587199395 |                   |                   |                  |
| h                 | -3.48644290571362 | -1.77716759240635 |                  |
| 0.45687869356089  |                   |                   |                  |
| h                 | -2.51568815488702 | -1.45542294936048 |                  |
| 1.84409538784044  |                   |                   |                  |
| h                 | 4.03584597087445  | -1.82165571080890 |                  |
| 0.34689045361368  |                   |                   |                  |
| h                 | 3.31151988274892  | -1.38248281513706 |                  |
| -1.22151438013575 |                   |                   |                  |
| h                 | 3.66600409605662  | -0.10782917773471 |                  |
| -0.01423955940630 |                   |                   |                  |
| n                 | -0.02008801857681 | 1.72270805073840  |                  |
| 1.28103634640324  |                   |                   |                  |
| c                 | 1.11094825939704  | 1.80755167402477  | 0.48687922370242 |
| n                 | 0.83021739818324  | 1.78129567731484  |                  |
| -0.87995432491886 |                   |                   |                  |
| c                 | -0.46033300408733 | 1.64799043313520  |                  |
| -1.35223308720712 |                   |                   |                  |
| c                 | -1.55498104961440 | 1.54114314369412  |                  |
| -0.55979177951821 |                   |                   |                  |
| c                 | -1.35910164568775 | 1.52725691965011  |                  |
| 0.88425832894874  |                   |                   |                  |
| o                 | 2.24814554150869  | 1.88951584532305  | 0.94573867663574 |
| o                 | -2.23822946164031 | 1.36199044002550  |                  |
| 1.72839116654181  |                   |                   |                  |
| c                 | -2.94700021586500 | 1.40013541806035  |                  |
| -1.10028901867519 |                   |                   |                  |
| c                 | 1.94859565007989  | 1.79684233833076  |                  |
| -1.83244223660428 |                   |                   |                  |
| h                 | 0.15981421807032  | 1.65339074488963  | 2.27845493609619 |
| h                 | -0.53259846026001 | 1.62613283689545  |                  |
| -2.43473271338542 |                   |                   |                  |
| h                 | -3.39394211410590 | 0.45833375043787  |                  |
| -0.76958953908421 |                   |                   |                  |
| h                 | -2.94432079903885 | 1.41439967331579  |                  |
| -2.19338783833765 |                   |                   |                  |
| h                 | -3.58732334183072 | 2.21067874274936  |                  |
| -0.73462843093229 |                   |                   |                  |

|                   |                  |                  |
|-------------------|------------------|------------------|
| h                 | 2.01549799185946 | 0.82743536292290 |
| -2.33552681600022 |                  |                  |
| h                 | 2.85731378364716 | 1.99281035815353 |
| -1.26551312641654 |                  |                  |
| h                 | 1.79086274151305 | 2.59139866266108 |
| -2.56660551532799 |                  |                  |

absoluteE.csv

```
;;;
;mA...mT;mA...mT + ZPVE;mA...mT cosmo
H;-1000.6246415320;-1000.3464547320;-1000.6494805045
S;-1000.6200775937;-1000.3405635937;-1000.6464501796
TS;-1000.6143979350;-1000.3357870350;-1000.6416417860
;;;
;mG...mC;mG...mC + ZPVE;mG...mC cosmo
H;-1016.6824341920;-1016.4153863920;-1016.7163080625
S;-1016.6632509298;-1016.3955038298;-1016.7034349018
TS;-1016.6624960184;-1016.3947999184;-1016.7016207149
```

cosmo\_mAmT\_HB.xyz

36

|   |                   |                   |                   |
|---|-------------------|-------------------|-------------------|
| n | 1.41185637365716  | -2.56989902266364 | -0.01239907394803 |
| c | 2.41312674453344  | -1.67299223317858 | -0.00497754746458 |
| n | 3.69500740118032  | -2.12692940619999 | 0.00034039027641  |
| c | 4.70042533141714  | -1.23456762040581 | 0.00642050832609  |
| n | 4.63852548392480  | 0.10597316297702  | 0.00793535389561  |
| c | 3.36050795177850  | 0.52796489243281  | 0.00253512907403  |
| c | 2.21338124153270  | -0.27263782563063 | -0.00391759525007 |
| n | 1.07561651833822  | 0.51871720983720  | -0.00753161758653 |
| c | 1.53449812999715  | 1.75944743597477  | -0.00344269262360 |
| n | 2.90391191884981  | 1.83210975157899  | 0.00279932092439  |
| h | 5.69982289215314  | -1.66338987009121 | 0.01068000137670  |
| h | 0.91213923476734  | 2.64363612028632  | -0.00440810550839 |
| c | 3.72380932652652  | 3.04655491086135  | 0.00658981970517  |
| h | 1.64745974548642  | -3.55404394509425 | -0.00706675603056 |
| h | 0.42239546016822  | -2.29733512748374 | -0.00919952176896 |
| h | 4.35689533545545  | 3.05987561677725  | 0.89613947216246  |
| h | 4.34723026396357  | 3.07309994662764  | -0.88956533084537 |
| h | 3.05538098103074  | 3.90708723956856  | 0.01659180560483  |
| n | -1.73473116430183 | 0.10561098479640  | -0.00709750064468 |
| c | -2.45117387876020 | 1.28462424969204  | -0.00386149704973 |
| n | -3.83375913047256 | 1.12171622050115  | -0.00327539550845 |
| c | -4.40504980487415 | -0.13001738751084 | 0.00387118252933  |
| c | -3.68941922212698 | -1.28758766407879 | 0.00547069414919  |
| c | -2.24479864833278 | -1.18772530559428 | -0.00083017638794 |
| o | -1.91331426659829 | 2.39662447929362  | -0.00230955976638 |
| o | -1.46796714236432 | -2.16596927026226 | -0.00141368561794 |
| c | -4.33378618857806 | -2.64485336312254 | 0.01326775855898  |
| c | -4.66692950941549 | 2.33750050099507  | 0.00097477150906  |
| h | -0.68908683349502 | 0.21371565688656  | -0.00837579780585 |
| h | -5.48965030026064 | -0.12983656855646 | 0.00774288267232  |
| h | -4.03517200246075 | -3.22394779641393 | -0.86803696921602 |
| h | -5.42303947219578 | -2.55570345265538 | 0.01838032068629  |
| h | -4.02641445814089 | -3.21753480697695 | 0.89576380191837  |
| h | -4.43840512774548 | 2.94645865762489  | -0.87555993440580 |
| h | -4.47678733916355 | 2.91681354378487  | 0.90680352923449  |
| h | -5.71077901956144 | 2.02792143314569  | -0.02694391387303 |

cosmo\_mAmT\_S.xyz

36

|   |                   |                   |                   |
|---|-------------------|-------------------|-------------------|
| n | -2.16894594017726 | -2.42907008973637 | -0.64719957606522 |
| c | -1.07670816361554 | -2.04079472432336 | 0.05430387391300  |
| n | -1.12201124546271 | -2.10135367850276 | 1.40592256759348  |
| c | -0.02701513183871 | -1.74765259714629 | 2.10268955944099  |
| n | 1.16292300910034  | -1.33107129946541 | 1.64453907588280  |
| c | 1.17968638626398  | -1.29240049981515 | 0.30022217120035  |
| c | 0.11987058158881  | -1.61357944554323 | -0.55976189671983 |
| n | 0.49252165592402  | -1.45794956085612 | -1.88499083950220 |
| c | 1.74846193292443  | -1.05397849501235 | -1.81154171894500 |
| n | 2.22698855386461  | -0.93971320877486 | -0.52576603016734 |
| h | -0.12478062372390 | -1.80894579185130 | 3.18356735764199  |
| h | 2.38068110422175  | -0.82948612648764 | -2.66018390035040 |
| c | 3.57236258243633  | -0.52101046191209 | -0.12417377975616 |
| h | -3.03480493341525 | -2.56051559652324 | -0.13967278406362 |
| h | -2.24545449603955 | -2.16551671461159 | -1.62139213896366 |
| h | 3.55923379468917  | 0.51612440923836  | 0.21574158525845  |
| h | 3.92427065695046  | -1.17391258965666 | 0.67588213377638  |



|   |                   |                   |                   |
|---|-------------------|-------------------|-------------------|
| h | 4.22882397153469  | -0.61342822700792 | -0.98936117208435 |
| n | -0.28481798479127 | 1.69945505226131  | -1.26574291889694 |
| c | 0.71533926838470  | 2.01247944072106  | -0.36311038620060 |
| n | 0.33301799040201  | 1.89268867826564  | 0.96602084609927  |
| c | -0.93935832117533 | 1.49905251973286  | 1.31541667549972  |
| c | -1.91601539307082 | 1.20214922188416  | 0.41771262487627  |
| c | -1.59600758903954 | 1.27715064700887  | -0.99430650223083 |
| o | 1.84657541041417  | 2.35999545470433  | -0.70972134443331 |
| o | -2.36331628246205 | 1.00605400085049  | -1.92754398152093 |
| c | -3.29806405503248 | 0.78780914460810  | 0.83275632584807  |
| c | 1.34677006538506  | 2.17117624532355  | 1.99872134922780  |
| h | -0.01917279997570 | 1.75050487710530  | -2.24558724151048 |
| h | -1.11209634916994 | 1.44342338407014  | 2.38400238951746  |
| h | -4.04215959549613 | 1.51928031013131  | 0.49712801016176  |
| h | -3.36422654842029 | 0.69557723052146  | 1.91937736118784  |
| h | -3.56435064871152 | -0.17369886290847 | 0.38348409948347  |
| h | 1.81629266997401  | 3.13453146694090  | 1.79794219625953  |
| h | 2.10179667095648  | 1.38237804327587  | 2.00384813767864  |
| h | 0.84304141920948  | 2.19955312554724  | 2.96381068542832  |

cosmo\_mAmT\_TS.xyz

36

|   |                    |                   |                   |
|---|--------------------|-------------------|-------------------|
| n | -0.10884834907049  | -2.72043040811549 | 0.27341484039236  |
| c | 0.81913026240346   | -1.80688800728249 | 0.65553927212980  |
| n | 1.06786505138474   | -1.66118187795477 | 1.97945041769820  |
| c | 2.00253072982833   | -0.77435321177652 | 2.36728435638946  |
| n | 2.75851393262624   | 0.03317768454537  | 1.60938853500870  |
| c | 2.48786685856779   | -0.13453911310890 | 0.30323413951311  |
| c | 1.56384613926500   | -1.02714564613483 | -0.25330772889792 |
| n | 1.53406936588595   | -0.90627551757882 | -1.63665652010068 |
| c | 2.43072052496728   | 0.03428128465036  | -1.88758891304411 |
| n | 3.04569215014362   | 0.53226985205180  | -0.76648068440141 |
| h | 2.15739876803305   | -0.70338104246045 | 3.44116468973047  |
| h | 2.67872080721503   | 0.40664046918068  | -2.87234865645047 |
| c | 4.03059993681172   | 1.61359196880263  | -0.70608697606234 |
| h | -0.71283244174474  | -3.09437556817114 | 0.99570120002116  |
| h | -0.50707496926612  | -2.66582048531547 | -0.65807431156766 |
| h | 3.61324151656262   | 2.45815639399819  | -0.15326134882962 |
| h | 4.93708882598986   | 1.26016869195059  | -0.21098304806372 |
| h | 4.26303647494064   | 1.91919521361763  | -1.72594443636159 |
| n | -1.24739983993024  | 0.28446804309324  | -1.12451312626357 |
| c | -0.92694072120455  | 1.43758541202860  | -0.42803202888704 |
| n | -1.86750931763553  | 1.79415257331171  | 0.53278355100685  |
| c | -2.995725440886143 | 1.03513533025740  | 0.74977527652429  |
| c | -3.28855493559419  | -0.10608737867466 | 0.06824127925540  |
| c | -2.34745002079939  | -0.55889960251864 | -0.93519027572848 |
| o | 0.09831690065352   | 2.08533856563903  | -0.63806004330989 |
| o | -2.43913864537695  | -1.60725921176330 | -1.59664661847539 |
| c | -4.52018920908355  | -0.92294750924533 | 0.33669791252756  |
| c | -1.60570155504278  | 3.01302613890962  | 1.31976657801478  |
| h | -0.51912936606369  | -0.04849280711851 | -1.76164855666262 |
| h | -3.65039613603757  | 1.41707540228018  | 1.52566138289265  |
| h | -5.12917185249065  | -1.01849632765776 | -0.56926177689479 |
| h | -5.12872195765831  | -0.46085062049777 | 1.11824210339241  |
| h | -4.25322356622666  | -1.93681204496789 | 0.65586149411398  |
| h | -1.53319269285926  | 3.87530074179592  | 0.65417042048796  |
| h | -0.67248795224501  | 2.90243530411027  | 1.87600193991063  |
| h | -2.43496708008581  | 3.14938321755600  | 2.01225798514533  |

cosmo\_mGmC\_HB.xyz

35

|   |                   |                   |                  |
|---|-------------------|-------------------|------------------|
| c | -0.81141806393247 | -0.08318289144537 | 2.98306581668042 |
| n | -0.68630073094501 | -0.07293012017960 | 4.38744155399074 |
| c | 0.54459989578919  | 0.01656182490785  | 4.96703762403545 |
| c | 1.67878140096260  | 0.09648159983593  | 4.22011677711619 |
| n | 1.52806266909066  | 0.08068241421206  | 2.79911503742760 |
| c | 0.31102430481858  | -0.00346111588833 | 2.22396563830687 |
| o | -1.95854857374321 | -0.16681393731186 | 2.48938594427127 |
| n | 2.59273992908946  | 0.15311403747482  | 1.98640541121395 |
| c | -1.90896086075621 | -0.16172102719253 | 5.20353462714789 |

|   |                   |                   |                   |
|---|-------------------|-------------------|-------------------|
| h | 0.56090160921432  | 0.01851165039968  | 6.05052009477419  |
| h | 2.64996185242618  | 0.16503317312662  | 4.69387908082354  |
| h | 3.52412192814317  | 0.18838033941087  | 2.37706304018150  |
| h | 2.47966948591851  | 0.08662289098974  | 0.96256587701537  |
| h | -2.43707650033502 | -1.09103489458867 | 4.98105651125757  |
| h | -2.56193797535751 | 0.68606782566249  | 4.98780366122972  |
| h | -1.61522729467408 | -0.14519152153626 | 6.25283275548518  |
| o | 2.26133037055320  | -0.07242944521992 | -0.84270601298131 |
| c | 1.15044277227835  | -0.02400017166822 | -1.41894585933071 |
| n | -0.03113104651502 | 0.06511327153366  | -0.66076160696001 |
| c | -1.30922992223119 | 0.13147768400184  | -1.17357852096835 |
| n | -1.57548013534345 | 0.10134143689407  | -2.47994718886117 |
| c | -0.45842806076497 | 0.01297878828518  | -3.23159492328681 |
| c | 0.87785049706614  | -0.04740506123785 | -2.81554508278357 |
| n | 1.73042738375540  | -0.12998617573674 | -3.90805754620327 |
| c | 0.92032685917238  | -0.11992085025386 | -4.94756250022400 |
| n | -0.41652110178991 | -0.03545236334668 | -4.60557036196135 |
| n | -2.31906129420102 | 0.27605185572571  | -0.28610788520577 |
| h | 0.09093985400908  | 0.05971439334338  | 0.38055712332247  |
| h | 1.22677139243238  | -0.17077508542274 | -5.98370440393769 |
| c | -1.56443075554481 | -0.00193289315976 | -5.51391981145304 |
| h | -3.25377050513668 | 0.16392039208672  | -0.65703926457608 |
| h | -2.17763342716316 | 0.09250069365486  | 0.72129685859283  |
| h | -2.21110202101850 | -0.86210911241333 | -5.32751994188132 |
| h | -2.13006328738630 | 0.91987318647191  | -5.36208484764859 |
| h | -1.18924237337265 | -0.03890225291118 | -6.53660071717758 |

cosmo\_mGmC\_S.xyz

35

|   |                   |                   |                   |
|---|-------------------|-------------------|-------------------|
| c | 0.77805901978290  | 0.29952826181736  | 2.05487285198418  |
| n | 0.04242181598662  | -0.91184495508507 | 2.18390685570420  |
| c | 0.37771921101909  | -2.00820757981289 | 1.45330096091976  |
| c | 1.39508956546567  | -1.97399142320735 | 0.54861041148940  |
| c | 2.05943659135900  | -0.72297498705850 | 0.38406290929612  |
| n | 1.77527468081380  | 0.34923508535027  | 1.12943811113257  |
| o | 0.46434048387136  | 1.26267359919456  | 2.77541276163973  |
| n | 3.04627787128774  | -0.58913651646998 | -0.54363370992672 |
| c | -1.10923241260549 | -0.92677142985349 | 3.09637348246419  |
| h | -0.21590081903133 | -2.89835560378303 | 1.62681198172065  |
| h | 1.64581031812536  | -2.84723302189820 | -0.03909629498293 |
| h | 3.06956641578649  | -1.25668097695965 | -1.30501046728453 |
| h | 3.29734650199300  | 0.36048161069552  | -0.79631127833857 |
| h | -1.87177863697452 | -0.23478943283428 | 2.73013262870938  |
| h | -0.79427329221297 | -0.62441118375836 | 4.09633655296396  |
| h | -1.51130068529052 | -1.93981911010737 | 3.12406274083003  |
| o | 1.49333442528924  | 1.98764795820227  | -2.25488531004734 |
| c | 0.50982079344405  | 1.49538138733552  | -1.68415909928032 |
| n | -0.20977717039270 | 2.26448770809742  | -0.72938972770942 |
| c | -1.28024577165901 | 1.83858858370932  | 0.02033039876463  |
| n | -1.80888612591089 | 0.63053560347375  | -0.09553130812211 |
| c | -1.17361956136390 | -0.12665765537505 | -1.01876409637761 |
| c | -0.07202416875633 | 0.19922423077020  | -1.81741084128963 |
| n | 0.30298640606137  | -0.88032190715758 | -2.60023894585545 |
| c | -0.56060357808910 | -1.82381235420231 | -2.28062722268118 |
| n | -1.48186028118044 | -1.42875172657997 | -1.33006701369214 |
| n | -1.84796614234496 | 2.74177523789203  | 0.87506353361904  |
| h | 0.14961850824222  | 3.20440460022778  | -0.58456242956684 |
| h | -0.58263853026415 | -2.82232338332284 | -2.69544490705964 |
| c | -2.56410333688248 | -2.22905565191010 | -0.75509577811106 |
| h | -2.47069003274991 | 2.31824973479139  | 1.55418731008130  |
| h | -1.24206068526616 | 3.44738500075089  | 1.27971908212152  |
| h | -2.51040854671663 | -2.18820238116424 | 0.33460418239959  |
| h | -3.53283297738945 | -1.84563346298172 | -1.08364963757182 |
| h | -2.44290432046703 | -3.25853300288735 | -1.09107100575496 |

cosmo\_mGmC\_TS.xyz

35

|   |                   |                   |                  |
|---|-------------------|-------------------|------------------|
| c | -0.17051111420766 | -0.25166032119073 | 2.63998444179154 |
| n | 0.72760509794693  | 0.84365142059180  | 2.68505681774651 |
| c | 0.42753822011915  | 2.00790277746483  | 2.04391457629117 |

|   |                   |                   |                   |
|---|-------------------|-------------------|-------------------|
| c | -0.73974614643380 | 2.15868752242086  | 1.35967997482355  |
| c | -1.63647865239231 | 1.04871048762271  | 1.36767389915200  |
| n | -1.36318261531624 | -0.09020533236175 | 2.01626421304137  |
| o | 0.19037425726973  | -1.33755918963086 | 3.14640043602437  |
| n | -2.82467838822889 | 1.11758218058040  | 0.72171961228327  |
| c | 1.99777739391073  | 0.68346419378591  | 3.41056484948528  |
| h | 1.17273641899479  | 2.79232337390520  | 2.10467064126604  |
| h | -0.96167077480392 | 3.08161295421846  | 0.83913279371618  |
| h | -3.00729270308208 | 1.87906256880778  | 0.08169616581111  |
| h | -3.33035861840132 | 0.25361945243787  | 0.56615446515410  |
| h | 2.62467548927709  | -0.06186528009022 | 2.91638210285191  |
| h | 1.797273204186135 | 0.36152425094503  | 4.43373429534013  |
| h | 2.50896813423467  | 1.64580543156102  | 3.41736024146312  |
| o | -2.29669084586316 | -1.80187743423573 | -0.99887263668135 |
| c | -1.14412097540448 | -1.36463374931151 | -1.12337687425848 |
| n | -0.12174905384032 | -1.80474891358035 | -0.23927208539764 |
| c | 1.18201791305658  | -1.36657933566941 | -0.21526515357224 |
| n | 1.67270568599088  | -0.51086932192464 | -1.09775832655225 |
| c | 0.74178142530970  | -0.09440005214428 | -1.98805712468959 |
| c | -0.61373204186135 | -0.43413527445684 | -2.06621736613648 |
| n | -1.23068234474858 | 0.24495449499814  | -3.10431221876134 |
| c | -0.26438059681487 | 0.97103088732023  | -3.63181197227514 |
| n | 0.95364220358280  | 0.81030664804712  | -3.00044965850751 |
| n | 1.99443251283083  | -1.90066345455149 | 0.74952754105897  |
| h | -0.43748517589148 | -2.43445122778550 | 0.49495753670688  |
| h | -0.36972030091994 | 1.63998942191050  | -4.47530792569681 |
| c | 2.21982790533280  | 1.46811974859885  | -3.33204284268191 |
| h | 2.90358347246592  | -1.45366339981610 | 0.80263117112238  |
| h | 1.56785403056983  | -2.07249908416773 | 1.66247853882520  |
| h | 2.59689452340314  | 2.00203672873958  | -2.45720221632083 |
| h | 2.95387098495143  | 0.72511274328780  | -3.65148698018692 |
| h | 2.03367076938386  | 2.17356620687370  | -4.14139361463878 |

mAmT\_HB.xyz  
36

|   |                   |                   |                   |
|---|-------------------|-------------------|-------------------|
| n | 1.43925780995280  | -2.59089954312358 | -0.01413633596387 |
| c | 2.42512602729149  | -1.67505129736014 | -0.00599086115999 |
| n | 3.71018687760711  | -2.10789596840329 | -0.00105507604809 |
| c | 4.69932305531202  | -1.20131145923315 | 0.00526096519537  |
| n | 4.62036874877480  | 0.14010966790548  | 0.00764163500078  |
| c | 3.33882976383009  | 0.53453241384750  | 0.00274413546241  |
| c | 2.20110442502880  | -0.27836197136329 | -0.00412243987360 |
| n | 1.05402421385616  | 0.49936312391789  | -0.00684539265993 |
| c | 1.48985696232730  | 1.74471502048420  | -0.00203361113110 |
| n | 2.86135746829621  | 1.83614795961756  | 0.00412133505639  |
| h | 5.70524101402759  | -1.61457265370758 | 0.00911059747241  |
| h | 0.84637069672063  | 2.61458177873092  | -0.00209731423611 |
| c | 3.67431322057757  | 3.04904410820771  | 0.00838472272253  |
| h | 1.70937562595685  | -3.56464805429511 | -0.00876476946415 |
| h | 0.44481040282352  | -2.34456688408582 | -0.00898510122527 |
| h | 4.31669961058822  | 3.06148907169429  | 0.89235171389858  |
| h | 4.30007749135082  | 3.08091694007760  | -0.88711770623802 |
| h | 3.00554367118613  | 3.91117423989836  | 0.02395478790115  |
| n | -1.71718198956479 | 0.10154320968927  | -0.00876194403002 |
| c | -2.42726058130239 | 1.28382615385303  | -0.00633541428152 |
| n | -3.82017200676624 | 1.11909833853125  | -0.00970153554494 |
| c | -4.39405655072127 | -0.13459869449259 | 0.00195184729521  |
| c | -3.68119994689826 | -1.29012233513137 | 0.00647882780382  |
| c | -2.22770314102426 | -1.19465927888576 | 0.00060208351834  |
| o | -1.90523271749506 | 2.39683680769494  | -0.00262862211062 |
| o | -1.46691354001702 | -2.17490073667770 | 0.00297950839816  |
| c | -4.31692581949050 | -2.65035643810146 | 0.01547333891560  |
| c | -4.6364787725958  | 2.34025330746090  | 0.00360001598254  |
| h | -0.66618937789859 | 0.20649300953080  | -0.00920773244421 |
| h | -5.48011374518647 | -0.13510444810123 | 0.00530684059785  |
| h | -4.00907206109738 | -3.22858351593997 | -0.86269049973555 |
| h | -5.40818247235560 | -2.57279019806331 | 0.02001014554842  |
| h | -4.00111803416121 | -3.22039912410658 | 0.89614937908358  |
| h | -4.34552111850672 | 2.98839705347849  | -0.82536480168556 |
| h | -4.49310719737033 | 2.88383182224430  | 0.94142809368195  |
| h | -5.68336785550906 | 2.05150016195010  | -0.10030376724513 |

mAmT\_S.xyz  
36

|   |                   |                   |                   |
|---|-------------------|-------------------|-------------------|
| n | -2.58495582890626 | -1.84521115821860 | 0.91194078759479  |
| c | -1.49419087427171 | -1.75516346314921 | 0.10800564775472  |
| n | -1.66960744225491 | -1.85131459304441 | -1.22807284677515 |
| c | -0.59229706189853 | -1.74750194921005 | -2.02198963280650 |
| n | 0.69329093715579  | -1.55754118482245 | -1.68171516144891 |
| c | 0.83304133355144  | -1.49756494219782 | -0.34748994247140 |
| c | -0.18708264036341 | -1.58756643281797 | 0.60982517023201  |
| n | 0.31653386458655  | -1.46041077340972 | 1.89339823993052  |
| c | 1.61083668014499  | -1.30617273714822 | 1.70596633283194  |
| n | 1.99612175799074  | -1.32418330897028 | 0.37858358069870  |
| h | -0.79270472322848 | -1.82192493385425 | -3.08825036222963 |
| h | 2.33967125674201  | -1.16398042129769 | 2.49272831405423  |
| c | 3.34435463198726  | -1.14229801957525 | -0.15768587199395 |
| h | -3.48644290571362 | -1.77716759240635 | 0.45687869356089  |
| h | -2.51568815488702 | -1.45542294936048 | 1.84409538784044  |
| h | 4.03584597087445  | -1.82165571080890 | 0.34689045361368  |
| h | 3.31151988274892  | -1.38248281513706 | -1.22151438013575 |
| h | 3.66600409605662  | -0.10782917773471 | -0.01423955940630 |
| n | -0.02008801857681 | 1.72270805073840  | 1.28103634640324  |
| c | 1.11094825939704  | 1.80755167402477  | 0.48687922370242  |
| n | 0.83021739818324  | 1.78129567731484  | -0.87995432491886 |
| c | -0.46033300408733 | 1.64799043313520  | -1.35223308720712 |
| c | -1.55498104961440 | 1.54114314369412  | -0.55979177951821 |
| c | -1.35910164568775 | 1.52725691965011  | 0.88425832894874  |
| o | 2.24814554150869  | 1.88951584532305  | 0.94573867663574  |
| o | -2.23822946164031 | 1.36199044002550  | 1.72839116654181  |
| c | -2.94700021586500 | 1.40013541806035  | -1.10028901867519 |
| c | 1.94859565007989  | 1.79684233833076  | -1.83244223660428 |
| h | 0.15981421807032  | 1.65339074488963  | 2.27845493609619  |
| h | -0.53259846026001 | 1.62613283689545  | -2.43473271338542 |
| h | -3.39394211410590 | 0.45833375043787  | -0.76958953908421 |
| h | -2.94432079903885 | 1.41439967331579  | -2.19338783833765 |
| h | -3.58732334183072 | 2.21067874274936  | -0.73462843093229 |
| h | 2.01549799185946  | 0.82743536292290  | -2.33552681600022 |
| h | 2.85731378364716  | 1.99281035815353  | -1.26551312641654 |
| h | 1.79086274151305  | 2.59139866266108  | -2.56660551532799 |

mAmT\_TS.xyz  
36

|   |                    |                   |                   |
|---|--------------------|-------------------|-------------------|
| n | -2.38037246488240  | -2.14621648676219 | 0.91717569161171  |
| c | -1.269082729621865 | -2.13507261062387 | 0.13295190159095  |
| n | -1.38410009567648  | -2.54358796704808 | -1.15041801108521 |
| c | -0.29245200636523  | -2.51647932951670 | -1.93333901694601 |
| n | 0.94438152932038   | -2.08662650726506 | -1.63664669583758 |
| c | 1.02667644449622   | -1.71283578256411 | -0.35035174720763 |
| c | 0.00036292823829   | -1.73967746607344 | 0.60527828117882  |
| n | 0.45791485189337   | -1.31144835472187 | 1.84224634996525  |
| c | 1.72570516173887   | -1.02719231364495 | 1.62531032008264  |
| n | 2.13500115245122   | -1.23256268077347 | 0.32200778233446  |
| h | -0.44162914737296  | -2.86800012226327 | -2.95138072848378 |
| h | 2.41002692445230   | -0.63569714618233 | 2.36583494105377  |
| c | 3.44489652349500   | -0.94123572818490 | -0.25753789308956 |
| h | -3.25803624336122  | -2.25460540717110 | 0.42363659249986  |
| h | -2.39099124999913  | -1.51572044731214 | 1.71228822348376  |
| h | 4.21287367132389   | -1.57895276515758 | 0.18948810461520  |
| h | 3.38188896996392   | -1.14889258048569 | -1.32677227234232 |
| h | 3.68801683504407   | 0.11160906581709  | -0.09033954345465 |
| n | -0.21221355844906  | 1.69439340787355  | 1.27854887915545  |
| c | 0.88439460193813   | 2.06957640349980  | 0.52159855253498  |
| n | 0.56451211031000   | 2.37409283626645  | -0.80415289745889 |
| c | -0.71091076889161  | 2.18545412719613  | -1.30165281137693 |
| c | -1.74758782388300  | 1.70435396525454  | -0.57166371317229 |
| c | -1.51479229504034  | 1.39667891126023  | 0.83351914806178  |
| o | 2.02520477056881   | 2.13940179076918  | 0.97169772824988  |
| o | -2.34433749037622  | 0.92681781783724  | 1.61154518645623  |
| c | -3.10938484118518  | 1.44075658391776  | -1.14451553992071 |
| c | 1.65807254763927   | 2.76169334080608  | -1.70621118835173 |

|   |                   |                  |                   |
|---|-------------------|------------------|-------------------|
| h | 0.00016451620289  | 1.39418878528252 | 2.22628254137528  |
| h | -0.81816976652284 | 2.42600542833869 | -2.35495484198901 |
| h | -3.33215242526228 | 0.36786128724830 | -1.11482440039995 |
| h | -3.16932294099623 | 1.77780391235470 | -2.18325407813562 |
| h | -3.88323298031862 | 1.94912416203527 | -0.56004349521910 |
| h | 1.97748553354487  | 1.90756091468012 | -2.31323472301161 |
| h | 2.49020769206102  | 3.10053465022119 | -1.09074898996449 |
| h | 1.31698619950484  | 3.57063501976433 | -2.35610061572609 |

mGmC\_HB.xyz

35

|   |                   |                   |                   |
|---|-------------------|-------------------|-------------------|
| c | -0.81841520557492 | -0.06660602662999 | 2.98489881534231  |
| n | -0.65734858647818 | -0.08348239062077 | 4.40084698094539  |
| c | 0.58655789729111  | -0.00800397435271 | 4.95179837223712  |
| c | 1.70428575296712  | 0.07497783728083  | 4.18209285617232  |
| c | 1.52256974580644  | 0.07622075867254  | 2.75727957219989  |
| n | 0.29487437734412  | 0.01486071293524  | 2.21376562079444  |
| o | -1.97210630639532 | -0.12958697469459 | 2.53068536241950  |
| n | 2.56697741218046  | 0.14324924044897  | 1.92196121919769  |
| c | -1.86831758746593 | -0.17789267255545 | 5.22570587548655  |
| h | 0.62974024903739  | -0.02040429074447 | 6.03600913587416  |
| h | 2.68553763298538  | 0.13214573073189  | 4.63806664692882  |
| h | 3.50465027760652  | 0.16440790824098  | 2.29573305146087  |
| h | 2.43234363601984  | 0.08744230709495  | 0.88451677175402  |
| h | -2.40799963382384 | -1.09820459559179 | 4.99114244569875  |
| h | -2.52406033902828 | 0.67196969084600  | 5.02442890347880  |
| h | -1.56978034127920 | -0.17854929320145 | 6.27577267864753  |
| o | 2.22812279807398  | -0.03620680594934 | -0.79380992872891 |
| c | 1.13790988770631  | -0.00345256994914 | -1.39645774981032 |
| n | -0.06733423699962 | 0.08497206706120  | -0.66202862888232 |
| c | -1.33603023327394 | 0.13443537841880  | -1.19244913287019 |
| n | -1.58437217889503 | 0.09325136324465  | -2.49754133202602 |
| c | -0.45122621467153 | 0.00707131431374  | -3.22585788780864 |
| c | 0.88384807637330  | -0.04391542941742 | -2.79957902669504 |
| n | 1.74739179537143  | -0.13071102005320 | -3.87991845672343 |
| c | 0.95333899891196  | -0.13264564659378 | -4.92346870325323 |
| n | -0.39612084566044 | -0.05129896171037 | -4.59944481214494 |
| n | -2.36329789844533 | 0.27231726938123  | -0.31749935770995 |
| h | 0.04193364896511  | 0.08468605975716  | 0.37591110959912  |
| h | 1.27309920651720  | -0.19049266018470 | -5.95590090845493 |
| c | -1.53848093065999 | -0.02739244175057 | -5.50516073587481 |
| h | -3.28601471719914 | 0.16238090531758  | -0.71288039074234 |
| h | -2.24190819961443 | 0.10372160996998  | 0.68966225718638  |
| h | -2.18579991645042 | -0.88887143847587 | -5.32011539389993 |
| h | -2.11672528315918 | 0.88827360112826  | -5.35611859931760 |
| h | -1.16473263052288 | -0.06296230104854 | -6.53015791945024 |

mGmC\_S.xyz

35

|   |                   |                   |                   |
|---|-------------------|-------------------|-------------------|
| c | 0.53273028954021  | 0.36579894716011  | 2.14850594710691  |
| n | 0.59242893004778  | -1.06976295588621 | 2.09859982384841  |
| c | 1.39826873017268  | -1.70143861242509 | 1.20490269163396  |
| c | 2.17877005889128  | -1.00277665249932 | 0.33674729366115  |
| c | 2.07716430686583  | 0.42455618360523  | 0.39355143831533  |
| n | 1.31758397341162  | 1.06078672915390  | 1.28120585914633  |
| o | -0.25429902789114 | 0.88162465011166  | 2.95081368274108  |
| n | 2.78943295341004  | 1.19161376957697  | -0.48109801194679 |
| c | -0.34366158981781 | -1.81067812371902 | 2.94797721236172  |
| h | 1.37711364774143  | -2.78679579595690 | 1.22246238971086  |
| h | 2.81427576845879  | -1.51233575929352 | -0.37608987679952 |
| h | 3.01713943365575  | 0.76508680906686  | -1.37232663711128 |
| h | 2.46066416158542  | 2.15011344636089  | -0.56175188352148 |
| h | -1.36006267900431 | -1.71207628116739 | 2.55266871439580  |
| h | -0.31386373777065 | -1.39922474871317 | 3.95723197730965  |
| h | -0.05164249858674 | -2.86325648966673 | 2.95967165290721  |
| o | 0.30776420927495  | 2.78074413763344  | -1.70064929500523 |
| c | -0.30906735159776 | 1.77627675539070  | -1.36006766701518 |
| n | -1.30904463644834 | 1.86545854554439  | -0.33677537244666 |
| c | -1.97360910787498 | 0.82169867470689  | 0.25193169965796  |
| n | -1.87395534919417 | -0.42807184169651 | -0.16264930048310 |

|   |                   |                   |                   |
|---|-------------------|-------------------|-------------------|
| c | -0.99524228461716 | -0.55606997349007 | -1.18729102701584 |
| c | -0.19985012244143 | 0.41473218236904  | -1.80205751017832 |
| n | 0.66066777287966  | -0.16095481924081 | -2.71909687014102 |
| c | 0.37319263711766  | -1.44260081202957 | -2.66969391547662 |
| n | -0.63018621620427 | -1.75015550138117 | -1.76473751968423 |
| n | -2.80520244008620 | 1.13748577328426  | 1.30904799087399  |
| h | -1.40635893869255 | 2.79363437589591  | 0.06507529707107  |
| h | 0.84193940982729  | -2.21477487249891 | -3.26577908894084 |
| c | -1.17055489941671 | -3.06331901454778 | -1.43404249422060 |
| h | -3.18655151769215 | 0.28906347541952  | 1.71681537732422  |
| h | -2.33231516403509 | 1.68447414627386  | 2.02975597226090  |
| h | -1.00898794038171 | -3.27799864477231 | -0.37386574355576 |
| h | -2.24317104091197 | -3.09379358279382 | -1.64201600108116 |
| h | -0.65814366522107 | -3.81010818891993 | -2.04281866342300 |

mGmC\_TS.xyz  
35

|   |                   |                   |                   |
|---|-------------------|-------------------|-------------------|
| c | -0.04011532371090 | 0.34798791136459  | 2.38397735223344  |
| n | 0.20282311678464  | -1.02655933368291 | 2.71975678232990  |
| c | 1.26484419062277  | -1.69042677646379 | 2.18858003222538  |
| c | 2.14339510648247  | -1.07081622576583 | 1.35380368420019  |
| c | 1.89834162039969  | 0.31348619568936  | 1.07488572680180  |
| n | 0.86665372111664  | 0.97669299409124  | 1.59419721483308  |
| o | -1.07518557274053 | 0.87275581567384  | 2.81886787063088  |
| n | 2.74343236531740  | 1.01405464787117  | 0.27180183789352  |
| c | -0.77700422581358 | -1.69863624306702 | 3.57866854825877  |
| h | 1.36544422459197  | -2.73543323286011 | 2.46502356713170  |
| h | 2.98609166001186  | -1.60916915796271 | 0.93701224442903  |
| h | 3.31076687607423  | 0.48973938676188  | -0.38230146423825 |
| h | 2.37089833276512  | 1.88881895098384  | -0.09876529056895 |
| h | -1.72260113243010 | -1.83474463639897 | 3.04474316040100  |
| h | -0.96330498588378 | -1.08491880893814 | 4.46140062120789  |
| h | -0.37544313485487 | -2.67030484615526 | 3.87371900062059  |
| o | 0.80164060048603  | 2.74990287808872  | -1.34587439500353 |
| c | 0.06901513529726  | 1.76131150691342  | -1.34776211651361 |
| n | -1.14729418672047 | 1.77707010956653  | -0.59730386653592 |
| c | -1.97715058473238 | 0.70894181847444  | -0.37053552878487 |
| n | -1.84023066180141 | -0.45770983507122 | -0.97586842225390 |
| c | -0.74221516547484 | -0.49580453782765 | -1.76849440523902 |
| c | 0.22964299065222  | 0.48654077045972  | -1.98264825044333 |
| n | 1.26316071424334  | -0.00046718514833 | -2.76313156460447 |
| c | 0.90881250582889  | -1.23749928603714 | -3.02834259757342 |
| n | -0.30126748592241 | -1.60370813215992 | -2.45708639403621 |
| n | -3.01517042714841 | 0.91418347014086  | 0.51466762590770  |
| h | -1.26700124766835 | 2.61349707261805  | -0.03191263139602 |
| h | 1.47320656059940  | -1.93694991582778 | -3.63160276754864 |
| c | -0.98199106403113 | -2.89115052173047 | -2.54825724186016 |
| h | -3.52531324170499 | 0.04984242470689  | 0.66819332386652  |
| h | -2.70842026653947 | 1.31735694001579  | 1.40338216214120  |
| h | -1.24773815784713 | -3.23787744503801 | -1.54682672175909 |
| h | -1.89286428195408 | -2.80239255215629 | -3.14728559425747 |
| h | -0.30435942327169 | -3.60617733043704 | -3.01809786391849 |

35

|                   |                   |                   |                  |
|-------------------|-------------------|-------------------|------------------|
| c                 | -0.81841520557492 | -0.06660602662999 |                  |
| 2.98489881534231  |                   |                   |                  |
| n                 | -0.65734858647818 | -0.08348239062077 |                  |
| 4.40084698094539  |                   |                   |                  |
| c                 | 0.58655789729111  | -0.00800397435271 |                  |
| 4.95179837223712  |                   |                   |                  |
| c                 | 1.70428575296712  | 0.07497783728083  | 4.18209285617232 |
| c                 | 1.52256974580644  | 0.07622075867254  | 2.75727957219989 |
| n                 | 0.29487437734412  | 0.01486071293524  | 2.21376562079444 |
| o                 | -1.97210630639532 | -0.12958697469459 |                  |
| 2.53068536241950  |                   |                   |                  |
| n                 | 2.56697741218046  | 0.14324924044897  | 1.92196121919769 |
| c                 | -1.86831758746593 | -0.17789267255545 |                  |
| 5.22570587548655  |                   |                   |                  |
| h                 | 0.62974024903739  | -0.02040429074447 |                  |
| 6.03600913587416  |                   |                   |                  |
| h                 | 2.68553763298538  | 0.13214573073189  | 4.63806664692882 |
| h                 | 3.50465027760652  | 0.16440790824098  | 2.29573305146087 |
| h                 | 2.43234363601984  | 0.08744230709495  | 0.88451677175402 |
| h                 | -2.40799963382384 | -1.09820459559179 |                  |
| 4.99114244569875  |                   |                   |                  |
| h                 | -2.52406033902828 | 0.67196969084600  |                  |
| 5.02442890347880  |                   |                   |                  |
| h                 | -1.56978034127920 | -0.17854929320145 |                  |
| 6.27577267864753  |                   |                   |                  |
| o                 | 2.22812279807398  | -0.03620680594934 |                  |
| -0.79380992872891 |                   |                   |                  |
| c                 | 1.13790988770631  | -0.00345256994914 |                  |
| -1.39645774981032 |                   |                   |                  |
| n                 | -0.06733423699962 | 0.08497206706120  |                  |
| -0.66202862888232 |                   |                   |                  |
| c                 | -1.33603023327394 | 0.13443537841880  |                  |
| -1.19244913287019 |                   |                   |                  |
| n                 | -1.58437217889503 | 0.09325136324465  |                  |
| -2.49754133202602 |                   |                   |                  |
| c                 | -0.45122621467153 | 0.00707131431374  |                  |
| -3.22585788780864 |                   |                   |                  |
| c                 | 0.88384807637330  | -0.04391542941742 |                  |
| -2.79957902669504 |                   |                   |                  |
| n                 | 1.74739179537143  | -0.13071102005320 |                  |
| -3.87991845672343 |                   |                   |                  |
| c                 | 0.95333899891196  | -0.13264564659378 |                  |
| -4.92346870325323 |                   |                   |                  |
| n                 | -0.39612084566044 | -0.05129896171037 |                  |
| -4.59944481214494 |                   |                   |                  |
| n                 | -2.36329789844533 | 0.27231726938123  |                  |
| -0.31749935770995 |                   |                   |                  |
| h                 | 0.04193364896511  | 0.08468605975716  | 0.37591110959912 |
| h                 | 1.27309920651720  | -0.19049266018470 |                  |
| -5.95590090845493 |                   |                   |                  |
| c                 | -1.53848093065999 | -0.02739244175057 |                  |
| -5.50516073587481 |                   |                   |                  |
| h                 | -3.28601471719914 | 0.16238090531758  |                  |
| -0.71288039074234 |                   |                   |                  |
| h                 | -2.24190819961443 | 0.10372160996998  |                  |
| 0.68966225718638  |                   |                   |                  |
| h                 | -2.18579991645042 | -0.88887143847587 |                  |
| -5.32011539389993 |                   |                   |                  |
| h                 | -2.11672528315918 | 0.88827360112826  |                  |
| -5.35611859931760 |                   |                   |                  |
| h                 | -1.16473263052288 | -0.06296230104854 |                  |
| -6.53015791945024 |                   |                   |                  |

35

|                   |                   |                   |                  |
|-------------------|-------------------|-------------------|------------------|
| c                 | 0.77805901978290  | 0.29952826181736  | 2.05487285198418 |
| n                 | 0.04242181598662  | -0.91184495508507 |                  |
| 2.18390685570420  |                   |                   |                  |
| c                 | 0.37771921101909  | -2.00820757981289 |                  |
| 1.45330096091976  |                   |                   |                  |
| c                 | 1.39508956546567  | -1.97399142320735 |                  |
| 0.54861041148940  |                   |                   |                  |
| c                 | 2.05943659135900  | -0.72297498705850 |                  |
| 0.38406290929612  |                   |                   |                  |
| n                 | 1.77527468081380  | 0.34923508535027  | 1.12943811113257 |
| o                 | 0.46434048387136  | 1.26267359919456  | 2.77541276163973 |
| n                 | 3.04627787128774  | -0.58913651646998 |                  |
| -0.54363370992672 |                   |                   |                  |
| c                 | -1.10923241260549 | -0.92677142985349 |                  |
| 3.09637348246419  |                   |                   |                  |
| h                 | -0.21590081903133 | -2.89835560378303 |                  |
| 1.62681198172065  |                   |                   |                  |
| h                 | 1.64581031812536  | -2.84723302189820 |                  |
| -0.03909629498293 |                   |                   |                  |
| h                 | 3.06956641578649  | -1.25668097695965 |                  |
| -1.30501046728453 |                   |                   |                  |
| h                 | 3.29734650199300  | 0.36048161069552  |                  |
| -0.79631127833857 |                   |                   |                  |
| h                 | -1.87177863697452 | -0.23478943283428 |                  |
| 2.73013262870938  |                   |                   |                  |
| h                 | -0.79427329221297 | -0.62441118375836 |                  |
| 4.09633655296396  |                   |                   |                  |
| h                 | -1.51130068529052 | -1.93981911010737 |                  |
| 3.12406274083003  |                   |                   |                  |
| o                 | 1.49333442528924  | 1.98764795820227  |                  |
| -2.25488531004734 |                   |                   |                  |
| c                 | 0.50982079344405  | 1.49538138733552  |                  |
| -1.68415909928032 |                   |                   |                  |
| n                 | -0.20977717039270 | 2.26448770809742  |                  |
| -0.72938972770942 |                   |                   |                  |
| c                 | -1.28024577165901 | 1.83858858370932  |                  |
| 0.02033039876463  |                   |                   |                  |
| n                 | -1.80888612591089 | 0.63053560347375  |                  |
| -0.09553130812211 |                   |                   |                  |
| c                 | -1.17361956136390 | -0.12665765537505 |                  |
| -1.01876409637761 |                   |                   |                  |
| c                 | -0.07202416875633 | 0.19922423077020  |                  |
| -1.81741084128963 |                   |                   |                  |
| n                 | 0.30298640606137  | -0.88032190715758 |                  |
| -2.60023894585545 |                   |                   |                  |
| c                 | -0.56060357808910 | -1.82381235420231 |                  |
| -2.28062722268118 |                   |                   |                  |
| n                 | -1.48186028118044 | -1.42875172657997 |                  |
| -1.33006701369214 |                   |                   |                  |
| n                 | -1.84796614234496 | 2.74177523789203  |                  |
| 0.87506353361904  |                   |                   |                  |
| h                 | 0.14961850824222  | 3.20440460022778  |                  |
| -0.58456242956684 |                   |                   |                  |
| h                 | -0.58263853026415 | -2.82232338332284 |                  |
| -2.69544490705964 |                   |                   |                  |
| c                 | -2.56410333688248 | -2.22905565191010 |                  |
| -0.75509577811106 |                   |                   |                  |
| h                 | -2.47069003274991 | 2.31824973479139  |                  |
| 1.55418731008130  |                   |                   |                  |
| h                 | -1.24206068526616 | 3.44738500075089  |                  |
| 1.27971908212152  |                   |                   |                  |
| h                 | -2.51040854671663 | -2.18820238116424 |                  |
| 0.33460418239959  |                   |                   |                  |



|                   |                   |                   |
|-------------------|-------------------|-------------------|
| h                 | -3.53283297738945 | -1.84563346298172 |
| -1.08364963757182 |                   |                   |
| h                 | -2.44290432046703 | -3.25853300288735 |
| -1.09107100575496 |                   |                   |

35

|                   |                   |                   |                  |
|-------------------|-------------------|-------------------|------------------|
| c                 | -0.04011532371090 | 0.34798791136459  |                  |
| 2.38397735223344  |                   |                   |                  |
| n                 | 0.20282311678464  | -1.02655933368291 |                  |
| 2.71975678232990  |                   |                   |                  |
| c                 | 1.26484419062277  | -1.69042677646379 |                  |
| 2.18858003222538  |                   |                   |                  |
| c                 | 2.14339510648247  | -1.07081622576583 |                  |
| 1.35380368420019  |                   |                   |                  |
| c                 | 1.89834162039969  | 0.31348619568936  | 1.07488572680180 |
| n                 | 0.86665372111664  | 0.97669299409124  | 1.59419721483308 |
| o                 | -1.07518557274053 | 0.87275581567384  |                  |
| 2.81886787063088  |                   |                   |                  |
| n                 | 2.74343236531740  | 1.01405464787117  | 0.27180183789352 |
| c                 | -0.77700422581358 | -1.69863624306702 |                  |
| 3.57866854825877  |                   |                   |                  |
| h                 | 1.36544422459197  | -2.73543323286011 |                  |
| 2.46502356713170  |                   |                   |                  |
| h                 | 2.98609166001186  | -1.60916915796271 |                  |
| 0.93701224442903  |                   |                   |                  |
| h                 | 3.31076687607423  | 0.48973938676188  |                  |
| -0.38230146423825 |                   |                   |                  |
| h                 | 2.37089833276512  | 1.88881895098384  |                  |
| -0.09876529056895 |                   |                   |                  |
| h                 | -1.72260113243010 | -1.83474463639897 |                  |
| 3.04474316040100  |                   |                   |                  |
| h                 | -0.96330498588378 | -1.08491880893814 |                  |
| 4.46140062120789  |                   |                   |                  |
| h                 | -0.37544313485487 | -2.67030484615526 |                  |
| 3.87371900062059  |                   |                   |                  |
| o                 | 0.80164060048603  | 2.74990287808872  |                  |
| -1.34587439500353 |                   |                   |                  |
| c                 | 0.06901513529726  | 1.76131150691342  |                  |
| -1.34776211651361 |                   |                   |                  |
| n                 | -1.14729418672047 | 1.77707010956653  |                  |
| -0.59730386653592 |                   |                   |                  |
| c                 | -1.97715058473238 | 0.70894181847444  |                  |
| -0.37053552878487 |                   |                   |                  |
| n                 | -1.84023066180141 | -0.45770983507122 |                  |
| -0.97586842225390 |                   |                   |                  |
| c                 | -0.74221516547484 | -0.49580453782765 |                  |
| -1.76849440523902 |                   |                   |                  |
| c                 | 0.22964299065222  | 0.48654077045972  |                  |
| -1.98264825044333 |                   |                   |                  |
| n                 | 1.26316071424334  | -0.00046718514833 |                  |
| -2.76313156460447 |                   |                   |                  |
| c                 | 0.90881250582889  | -1.23749928603714 |                  |
| -3.02834259757342 |                   |                   |                  |
| n                 | -0.30126748592241 | -1.60370813215992 |                  |
| -2.45708639403621 |                   |                   |                  |
| n                 | -3.01517042714841 | 0.91418347014086  |                  |
| 0.51466762590770  |                   |                   |                  |
| h                 | -1.26700124766835 | 2.61349707261805  |                  |
| -0.03191263139602 |                   |                   |                  |
| h                 | 1.47320656059940  | -1.93694991582778 |                  |
| -3.63160276754864 |                   |                   |                  |
| c                 | -0.98199106403113 | -2.89115052173047 |                  |
| -2.54825724186016 |                   |                   |                  |
| h                 | -3.52531324170499 | 0.04984242470689  |                  |
| 0.66819332386652  |                   |                   |                  |
| h                 | -2.70842026653947 | 1.31735694001579  |                  |
| 1.40338216214120  |                   |                   |                  |
| h                 | -1.24773815784713 | -3.23787744503801 |                  |
| -1.54682672175909 |                   |                   |                  |

|                   |                   |                   |
|-------------------|-------------------|-------------------|
| h                 | -1.89286428195408 | -2.80239255215629 |
| -3.14728559425747 |                   |                   |
| h                 | -0.30435942327169 | -3.60617733043704 |
| -3.01809786391849 |                   |                   |

35

|                   |                   |                   |                  |
|-------------------|-------------------|-------------------|------------------|
| c                 | -0.81141806393247 | -0.08318289144537 |                  |
| 2.98306581668042  |                   |                   |                  |
| n                 | -0.68630073094501 | -0.07293012017960 |                  |
| 4.38744155399074  |                   |                   |                  |
| c                 | 0.54459989578919  | 0.01656182490785  | 4.96703762403545 |
| c                 | 1.67878140096260  | 0.09648159983593  | 4.22011677711619 |
| c                 | 1.52806266909066  | 0.08068241421206  | 2.79911503742760 |
| n                 | 0.31102430481858  | -0.00346111588833 |                  |
| 2.22396563830687  |                   |                   |                  |
| o                 | -1.95854857374321 | -0.16681393731186 |                  |
| 2.48938594427127  |                   |                   |                  |
| n                 | 2.59273992908946  | 0.15311403747482  | 1.98640541121395 |
| c                 | -1.90896086075621 | -0.16172102719253 |                  |
| 5.20353462714789  |                   |                   |                  |
| h                 | 0.56090160921432  | 0.01851165039968  | 6.05052009477419 |
| h                 | 2.64996185242618  | 0.16503317312662  | 4.69387908082354 |
| h                 | 3.52412192814317  | 0.18838033941087  | 2.37706304018150 |
| h                 | 2.47966948591851  | 0.08662289098974  | 0.96256587701537 |
| h                 | -2.43707650033502 | -1.09103489458867 |                  |
| 4.98105651125757  |                   |                   |                  |
| h                 | -2.56193797535751 | 0.68606782566249  |                  |
| 4.98780366122972  |                   |                   |                  |
| h                 | -1.61522729467408 | -0.14519152153626 |                  |
| 6.25283275548518  |                   |                   |                  |
| o                 | 2.26133037055320  | -0.07242944521992 |                  |
| -0.84270601298131 |                   |                   |                  |
| c                 | 1.15044277227835  | -0.02400017166822 |                  |
| -1.41894585933071 |                   |                   |                  |
| n                 | -0.03113104651502 | 0.06511327153366  |                  |
| -0.66076160696001 |                   |                   |                  |
| c                 | -1.30922992223119 | 0.13147768400184  |                  |
| -1.17357852096835 |                   |                   |                  |
| n                 | -1.57548013534345 | 0.10134143689407  |                  |
| -2.47994718886117 |                   |                   |                  |
| c                 | -0.45842806076497 | 0.01297878828518  |                  |
| -3.23159492328681 |                   |                   |                  |
| c                 | 0.87785049706614  | -0.04740506123785 |                  |
| -2.81554508278357 |                   |                   |                  |
| n                 | 1.73042738375540  | -0.12998617573674 |                  |
| -3.90805754620327 |                   |                   |                  |
| c                 | 0.92032685917238  | -0.11992085025386 |                  |
| -4.94756250022400 |                   |                   |                  |
| n                 | -0.41652110178991 | -0.03545236334668 |                  |
| -4.60557036196135 |                   |                   |                  |
| n                 | -2.31906129420102 | 0.27605185572571  |                  |
| -0.28610788520577 |                   |                   |                  |
| h                 | 0.09093985400908  | 0.05971439334338  | 0.38055712332247 |
| h                 | 1.22677139243238  | -0.17077508542274 |                  |
| -5.98370440393769 |                   |                   |                  |
| c                 | -1.56443075554481 | -0.00193289315976 |                  |
| -5.51391981145304 |                   |                   |                  |
| h                 | -3.25377050513668 | 0.16392039208672  |                  |
| -0.65703926457608 |                   |                   |                  |
| h                 | -2.17763342716316 | 0.09250069365486  |                  |
| 0.72129685859283  |                   |                   |                  |
| h                 | -2.21110202101850 | -0.86210911241333 |                  |
| -5.32751994188132 |                   |                   |                  |
| h                 | -2.13006328738630 | 0.91987318647191  |                  |
| -5.36208484764859 |                   |                   |                  |
| h                 | -1.18924237337265 | -0.03890225291118 |                  |
| -6.53660071717758 |                   |                   |                  |

36

|                   |                   |                   |                  |
|-------------------|-------------------|-------------------|------------------|
| n                 | 1.43925780995280  | -2.59089954312358 |                  |
| -0.01413633596387 |                   |                   |                  |
| c                 | 2.42512602729149  | -1.67505129736014 |                  |
| -0.00599086115999 |                   |                   |                  |
| n                 | 3.71018687760711  | -2.10789596840329 |                  |
| -0.00105507604809 |                   |                   |                  |
| c                 | 4.69932305531202  | -1.20131145923315 |                  |
| 0.00526096519537  |                   |                   |                  |
| n                 | 4.62036874877480  | 0.14010966790548  | 0.00764163500078 |
| c                 | 3.33882976383009  | 0.53453241384750  | 0.00274413546241 |
| c                 | 2.20110442502880  | -0.27836197136329 |                  |
| -0.00412243987360 |                   |                   |                  |
| n                 | 1.05402421385616  | 0.49936312391789  |                  |
| -0.00684539265993 |                   |                   |                  |
| c                 | 1.48985696232730  | 1.74471502048420  |                  |
| -0.00203361113110 |                   |                   |                  |
| n                 | 2.86135746829621  | 1.83614795961756  | 0.00412133505639 |
| h                 | 5.70524101402759  | -1.61457265370758 |                  |
| 0.00911059747241  |                   |                   |                  |
| h                 | 0.84637069672063  | 2.61458177873092  |                  |
| -0.00209731423611 |                   |                   |                  |
| c                 | 3.67431322057757  | 3.04904410820771  | 0.00838472272253 |
| h                 | 1.70937562595685  | -3.56464805429511 |                  |
| -0.00876476946415 |                   |                   |                  |
| h                 | 0.44481040282352  | -2.34456688408582 |                  |
| -0.00898510122527 |                   |                   |                  |
| h                 | 4.31669961058822  | 3.06148907169429  | 0.89235171389858 |
| h                 | 4.30007749135082  | 3.08091694007760  |                  |
| -0.88711770623802 |                   |                   |                  |
| h                 | 3.00554367118613  | 3.91117423989836  | 0.02395478790115 |
| n                 | -1.71718198956479 | 0.10154320968927  |                  |
| -0.00876194403002 |                   |                   |                  |
| c                 | -2.42726058130239 | 1.28382615385303  |                  |
| -0.00633541428152 |                   |                   |                  |
| n                 | -3.82017200676624 | 1.11909833853125  |                  |
| -0.00970153554494 |                   |                   |                  |
| c                 | -4.39405655072127 | -0.13459869449259 |                  |
| 0.00195184729521  |                   |                   |                  |
| c                 | -3.68119994689826 | -1.29012233513137 |                  |
| 0.00647882780382  |                   |                   |                  |
| c                 | -2.22770314102426 | -1.19465927888576 |                  |
| 0.00060208351834  |                   |                   |                  |
| o                 | -1.90523271749506 | 2.39683680769494  |                  |
| -0.00262862211062 |                   |                   |                  |
| o                 | -1.46691354001702 | -2.17490073667770 |                  |
| 0.00297950839816  |                   |                   |                  |
| c                 | -4.31692581949050 | -2.65035643810146 |                  |
| 0.01547333891560  |                   |                   |                  |
| c                 | -4.63647877725958 | 2.34025330746090  |                  |
| 0.00360001598254  |                   |                   |                  |
| h                 | -0.66618937789859 | 0.20649300953080  |                  |
| -0.00920773244421 |                   |                   |                  |
| h                 | -5.48011374518647 | -0.13510444810123 |                  |
| 0.00530684059785  |                   |                   |                  |
| h                 | -4.00907206109738 | -3.22858351593997 |                  |
| -0.86269049973555 |                   |                   |                  |
| h                 | -5.40818247235560 | -2.57279019806331 |                  |
| 0.02001014554842  |                   |                   |                  |
| h                 | -4.00111803416121 | -3.22039912410658 |                  |
| 0.89614937908358  |                   |                   |                  |
| h                 | -4.34552111850672 | 2.98839705347849  |                  |
| -0.82536480168556 |                   |                   |                  |
| h                 | -4.49310719737033 | 2.88383182224430  |                  |

0.94142809368195  
h -5.68336785550906 2.05150016195010  
-0.10030376724513

36

|                   |                   |                   |                  |
|-------------------|-------------------|-------------------|------------------|
| n                 | 1.41185637365716  | -2.56989902266364 |                  |
| -0.01239907394803 |                   |                   |                  |
| c                 | 2.41312674453344  | -1.67299223317858 |                  |
| -0.00497754746458 |                   |                   |                  |
| n                 | 3.69500740118032  | -2.12692940619999 |                  |
| 0.00034039027641  |                   |                   |                  |
| c                 | 4.70042533141714  | -1.23456762040581 |                  |
| 0.00642050832609  |                   |                   |                  |
| n                 | 4.63852548392480  | 0.10597316297702  | 0.00793535389561 |
| c                 | 3.36050795177850  | 0.52796489243281  | 0.00253512907403 |
| c                 | 2.21338124153270  | -0.27263782563063 |                  |
| -0.00391759525007 |                   |                   |                  |
| n                 | 1.07561651833822  | 0.51871720983720  |                  |
| -0.00753161758653 |                   |                   |                  |
| c                 | 1.53449812999715  | 1.75944743597477  |                  |
| -0.00344269262360 |                   |                   |                  |
| n                 | 2.90391191884981  | 1.83210975157899  | 0.00279932092439 |
| h                 | 5.69982289215314  | -1.66338987009121 |                  |
| 0.01068000137670  |                   |                   |                  |
| h                 | 0.91213923476734  | 2.64363612028632  |                  |
| -0.00440810550839 |                   |                   |                  |
| c                 | 3.72380932652652  | 3.04655491086135  | 0.00658981970517 |
| h                 | 1.64745974548642  | -3.55404394509425 |                  |
| -0.00706675603056 |                   |                   |                  |
| h                 | 0.42239546016822  | -2.29733512748374 |                  |
| -0.00919952176896 |                   |                   |                  |
| h                 | 4.35689533545545  | 3.05987561677725  | 0.89613947216246 |
| h                 | 4.34723026396357  | 3.07309994662764  |                  |
| -0.88956533084537 |                   |                   |                  |
| h                 | 3.05538098103074  | 3.90708723956856  | 0.01659180560483 |
| n                 | -1.73473116430183 | 0.10561098479640  |                  |
| -0.00709750064468 |                   |                   |                  |
| c                 | -2.45117387876020 | 1.28462424969204  |                  |
| -0.00386149704973 |                   |                   |                  |
| n                 | -3.83375913047256 | 1.12171622050115  |                  |
| -0.00327539550845 |                   |                   |                  |
| c                 | -4.40504980487415 | -0.13001738751084 |                  |
| 0.00387118252933  |                   |                   |                  |
| c                 | -3.68941922212698 | -1.28758766407879 |                  |
| 0.00547069414919  |                   |                   |                  |
| c                 | -2.24479864833278 | -1.18772530559428 |                  |
| -0.00083017638794 |                   |                   |                  |
| o                 | -1.91331426659829 | 2.39662447929362  |                  |
| -0.00230955976638 |                   |                   |                  |
| o                 | -1.46796714236432 | -2.16596927026226 |                  |
| -0.00141368561794 |                   |                   |                  |
| c                 | -4.33378618857806 | -2.64485336312254 |                  |
| 0.01326775855898  |                   |                   |                  |
| c                 | -4.66692950941549 | 2.33750050099507  |                  |
| 0.00097477150906  |                   |                   |                  |
| h                 | -0.68908683349502 | 0.21371565688656  |                  |
| -0.00837579780585 |                   |                   |                  |
| h                 | -5.48965030026064 | -0.12983656855646 |                  |
| 0.00774288267232  |                   |                   |                  |
| h                 | -4.03517200246075 | -3.22394779641393 |                  |
| -0.86803696921602 |                   |                   |                  |
| h                 | -5.42303947219578 | -2.55570345265538 |                  |
| 0.01838032068629  |                   |                   |                  |
| h                 | -4.02641445814089 | -3.21753480697695 |                  |
| 0.89576380191837  |                   |                   |                  |
| h                 | -4.43840512774548 | 2.94645865762489  |                  |
| -0.87555993440580 |                   |                   |                  |
| h                 | -4.47678733916355 | 2.91681354378487  |                  |

0.90680352923449  
h -5.71077901956144 2.02792143314569  
-0.02694391387303



35

|                   |                   |                   |                  |
|-------------------|-------------------|-------------------|------------------|
| c                 | -0.17051111420766 | -0.25166032119073 |                  |
| 2.63998444179154  |                   |                   |                  |
| n                 | 0.72760509794693  | 0.84365142059180  | 2.68505681774651 |
| c                 | 0.42753822011915  | 2.00790277746483  | 2.04391457629117 |
| c                 | -0.73974614643380 | 2.15868752242086  |                  |
| 1.35967997482355  |                   |                   |                  |
| c                 | -1.63647865239231 | 1.04871048762271  |                  |
| 1.36767389915200  |                   |                   |                  |
| n                 | -1.36318261531624 | -0.09020533236175 |                  |
| 2.01626421304137  |                   |                   |                  |
| o                 | 0.19037425726973  | -1.33755918963086 |                  |
| 3.14640043602437  |                   |                   |                  |
| n                 | -2.82467838822889 | 1.11758218058040  |                  |
| 0.72171961228327  |                   |                   |                  |
| c                 | 1.99777739391073  | 0.68346419378591  | 3.41056484948528 |
| h                 | 1.17273641899479  | 2.79232337390520  | 2.10467064126604 |
| h                 | -0.96167077480392 | 3.08161295421846  |                  |
| 0.83913279371618  |                   |                   |                  |
| h                 | -3.00729270308208 | 1.87906256880778  |                  |
| 0.08169616581111  |                   |                   |                  |
| h                 | -3.33035861840132 | 0.25361945243787  |                  |
| 0.56615446515410  |                   |                   |                  |
| h                 | 2.62467548927709  | -0.06186528009022 |                  |
| 2.91638210285191  |                   |                   |                  |
| h                 | 1.79727836829143  | 0.36152425094503  | 4.43373429534013 |
| h                 | 2.50896813423467  | 1.64580543156102  | 3.41736024146312 |
| o                 | -2.29669084586316 | -1.80187743423573 |                  |
| -0.99887263668135 |                   |                   |                  |
| c                 | -1.14412097540448 | -1.36463374931151 |                  |
| -1.12337687425848 |                   |                   |                  |
| n                 | -0.12174905384032 | -1.80474891358035 |                  |
| -0.23927208539764 |                   |                   |                  |
| c                 | 1.18201791305658  | -1.36657933566941 |                  |
| -0.21526515357224 |                   |                   |                  |
| n                 | 1.67270568599088  | -0.51086932192464 |                  |
| -1.09775832655225 |                   |                   |                  |
| c                 | 0.74178142530970  | -0.09440005214428 |                  |
| -1.98805712468959 |                   |                   |                  |
| c                 | -0.61373204186135 | -0.43413527445684 |                  |
| -2.06621736613648 |                   |                   |                  |
| n                 | -1.23068234474858 | 0.24495449499814  |                  |
| -3.10431221876134 |                   |                   |                  |
| c                 | -0.26438059681487 | 0.97103088732023  |                  |
| -3.63181197227514 |                   |                   |                  |
| n                 | 0.95364220358280  | 0.81030664804712  |                  |
| -3.00044965850751 |                   |                   |                  |
| n                 | 1.99443251283083  | -1.90066345455149 |                  |
| 0.74952754105897  |                   |                   |                  |
| h                 | -0.43748517589148 | -2.43445122778550 |                  |
| 0.49495753670688  |                   |                   |                  |
| h                 | -0.36972030091994 | 1.63998942191050  |                  |
| -4.47530792569681 |                   |                   |                  |
| c                 | 2.21982790533280  | 1.46811974859885  |                  |
| -3.33204284268191 |                   |                   |                  |
| h                 | 2.90358347246592  | -1.45366339981610 |                  |
| 0.80263117112238  |                   |                   |                  |
| h                 | 1.56785403056983  | -2.07249908416773 |                  |
| 1.66247853882520  |                   |                   |                  |
| h                 | 2.59689452340314  | 2.00203672873958  |                  |
| -2.45720221632083 |                   |                   |                  |
| h                 | 2.95387098495143  | 0.72511274328780  |                  |
| -3.65148698018692 |                   |                   |                  |
| h                 | 2.03367076938386  | 2.17356620687370  |                  |

**-4.14139361463878**

36

|                   |                   |                   |                  |
|-------------------|-------------------|-------------------|------------------|
| n                 | -2.16894594017726 | -2.42907008973637 |                  |
| -0.64719957606522 |                   |                   |                  |
| c                 | -1.07670816361554 | -2.04079472432336 |                  |
| 0.05430387391300  |                   |                   |                  |
| n                 | -1.12201124546271 | -2.10135367850276 |                  |
| 1.40592256759348  |                   |                   |                  |
| c                 | -0.02701513183871 | -1.74765259714629 |                  |
| 2.10268955944099  |                   |                   |                  |
| n                 | 1.16292300910034  | -1.33107129946541 |                  |
| 1.64453907588280  |                   |                   |                  |
| c                 | 1.17968638626398  | -1.29240049981515 |                  |
| 0.30022217120035  |                   |                   |                  |
| c                 | 0.11987058158881  | -1.61357944554323 |                  |
| -0.55976189671983 |                   |                   |                  |
| n                 | 0.49252165592402  | -1.45794956085612 |                  |
| -1.88499083950220 |                   |                   |                  |
| c                 | 1.74846193292443  | -1.05397849501235 |                  |
| -1.81154171894500 |                   |                   |                  |
| n                 | 2.22698855386461  | -0.93971320877486 |                  |
| -0.52576603016734 |                   |                   |                  |
| h                 | -0.12478062372390 | -1.80894579185130 |                  |
| 3.18356735764199  |                   |                   |                  |
| h                 | 2.38068110422175  | -0.82948612648764 |                  |
| -2.66018390035040 |                   |                   |                  |
| c                 | 3.57236258243633  | -0.52101046191209 |                  |
| -0.12417377975616 |                   |                   |                  |
| h                 | -3.03480493341525 | -2.56051559652324 |                  |
| -0.13967278406362 |                   |                   |                  |
| h                 | -2.24545449603955 | -2.16551671461159 |                  |
| -1.62139213896366 |                   |                   |                  |
| h                 | 3.55923379468917  | 0.51612440923836  | 0.21574158525845 |
| h                 | 3.92427065695046  | -1.17391258965666 |                  |
| 0.67588213377638  |                   |                   |                  |
| h                 | 4.22882397153469  | -0.61342822700792 |                  |
| -0.98936117208435 |                   |                   |                  |
| n                 | -0.28481798479127 | 1.69945505226131  |                  |
| -1.26574291889694 |                   |                   |                  |
| c                 | 0.71533926838470  | 2.01247944072106  |                  |
| -0.36311038620060 |                   |                   |                  |
| n                 | 0.33301799040201  | 1.89268867826564  | 0.96602084609927 |
| c                 | -0.93935832117533 | 1.49905251973286  |                  |
| 1.31541667549972  |                   |                   |                  |
| c                 | -1.91601539307082 | 1.20214922188416  |                  |
| 0.41771262487627  |                   |                   |                  |
| c                 | -1.59600758903954 | 1.27715064700887  |                  |
| -0.99430650223083 |                   |                   |                  |
| o                 | 1.84657541041417  | 2.35999545470433  |                  |
| -0.70972134443331 |                   |                   |                  |
| o                 | -2.36331628246205 | 1.00605400085049  |                  |
| -1.92754398152093 |                   |                   |                  |
| c                 | -3.29806405503248 | 0.78780914460810  |                  |
| 0.83275632584807  |                   |                   |                  |
| c                 | 1.34677006538506  | 2.17117624532355  | 1.99872134922780 |
| h                 | -0.01917279997570 | 1.75050487710530  |                  |
| -2.24558724151048 |                   |                   |                  |
| h                 | -1.11209634916994 | 1.44342338407014  |                  |
| 2.38400238951746  |                   |                   |                  |
| h                 | -4.04215959549613 | 1.51928031013131  |                  |
| 0.49712801016176  |                   |                   |                  |
| h                 | -3.36422654842029 | 0.69557723052146  |                  |
| 1.91937736118784  |                   |                   |                  |
| h                 | -3.56435064871152 | -0.17369886290847 |                  |
| 0.38348409948347  |                   |                   |                  |

|          |                         |                         |                         |
|----------|-------------------------|-------------------------|-------------------------|
| <b>h</b> | <b>1.81629266997401</b> | <b>3.13453146694090</b> | <b>1.79794219625953</b> |
| <b>h</b> | <b>2.10179667095648</b> | <b>1.38237804327587</b> | <b>2.00384813767864</b> |
| <b>h</b> | <b>0.84304141920948</b> | <b>2.19955312554724</b> | <b>2.96381068542832</b> |

35

|                   |                   |                   |                  |
|-------------------|-------------------|-------------------|------------------|
| c                 | 0.53273028954021  | 0.36579894716011  | 2.14850594710691 |
| n                 | 0.59242893004778  | -1.06976295588621 |                  |
| 2.09859982384841  |                   |                   |                  |
| c                 | 1.39826873017268  | -1.70143861242509 |                  |
| 1.20490269163396  |                   |                   |                  |
| c                 | 2.17877005889128  | -1.00277665249932 |                  |
| 0.33674729366115  |                   |                   |                  |
| c                 | 2.07716430686583  | 0.42455618360523  | 0.39355143831533 |
| n                 | 1.31758397341162  | 1.06078672915390  | 1.28120585914633 |
| o                 | -0.25429902789114 | 0.88162465011166  |                  |
| 2.95081368274108  |                   |                   |                  |
| n                 | 2.78943295341004  | 1.19161376957697  |                  |
| -0.48109801194679 |                   |                   |                  |
| c                 | -0.34366158981781 | -1.81067812371902 |                  |
| 2.94797721236172  |                   |                   |                  |
| h                 | 1.37711364774143  | -2.78679579595690 |                  |
| 1.22246238971086  |                   |                   |                  |
| h                 | 2.81427576845879  | -1.51233575929352 |                  |
| -0.37608987679952 |                   |                   |                  |
| h                 | 3.01713943365575  | 0.76508680906686  |                  |
| -1.37232663711128 |                   |                   |                  |
| h                 | 2.46066416158542  | 2.15011344636089  |                  |
| -0.56175188352148 |                   |                   |                  |
| h                 | -1.36006267900431 | -1.71207628116739 |                  |
| 2.55266871439580  |                   |                   |                  |
| h                 | -0.31386373777065 | -1.39922474871317 |                  |
| 3.95723197730965  |                   |                   |                  |
| h                 | -0.05164249858674 | -2.86325648966673 |                  |
| 2.95967165290721  |                   |                   |                  |
| o                 | 0.30776420927495  | 2.78074413763344  |                  |
| -1.70064929500523 |                   |                   |                  |
| c                 | -0.30906735159776 | 1.77627675539070  |                  |
| -1.36006766701518 |                   |                   |                  |
| n                 | -1.30904463644834 | 1.86545854554439  |                  |
| -0.33677537244666 |                   |                   |                  |
| c                 | -1.97360910787498 | 0.82169867470689  |                  |
| 0.25193169965796  |                   |                   |                  |
| n                 | -1.87395534919417 | -0.42807184169651 |                  |
| -0.16264930048310 |                   |                   |                  |
| c                 | -0.99524228461716 | -0.55606997349007 |                  |
| -1.18729102701584 |                   |                   |                  |
| c                 | -0.19985012244143 | 0.41473218236904  |                  |
| -1.80205751017832 |                   |                   |                  |
| n                 | 0.66066777287966  | -0.16095481924081 |                  |
| -2.71909687014102 |                   |                   |                  |
| c                 | 0.37319263711766  | -1.44260081202957 |                  |
| -2.66969391547662 |                   |                   |                  |
| n                 | -0.63018621620427 | -1.75015550138117 |                  |
| -1.76473751968423 |                   |                   |                  |
| n                 | -2.80520244008620 | 1.13748577328426  |                  |
| 1.30904799087399  |                   |                   |                  |
| h                 | -1.40635893869255 | 2.79363437589591  |                  |
| 0.06507529707107  |                   |                   |                  |
| h                 | 0.84193940982729  | -2.21477487249891 |                  |
| -3.26577908894084 |                   |                   |                  |
| c                 | -1.17055489941671 | -3.06331901454778 |                  |
| -1.43404249422060 |                   |                   |                  |
| h                 | -3.18655151769215 | 0.28906347541952  |                  |
| 1.71681537732422  |                   |                   |                  |
| h                 | -2.33231516403509 | 1.68447414627386  |                  |
| 2.02975597226090  |                   |                   |                  |
| h                 | -1.00898794038171 | -3.27799864477231 |                  |
| -0.37386574355576 |                   |                   |                  |

|                   |                   |                   |
|-------------------|-------------------|-------------------|
| h                 | -2.24317104091197 | -3.09379358279382 |
| -1.64201600108116 |                   |                   |
| h                 | -0.65814366522107 | -3.81010818891993 |
| -2.04281866342300 |                   |                   |
